# Supplementary material for: Cost-Utility of Quadrivalent Versus Trivalent Influenza Vaccine in Germany, Using an Individual-Based Dynamic Transmission Model
Source: PubMed Central journal article supplement — Pharmacoeconomics. 2016 Sep 19;34(12):1299–308. doi: 10.1007/s40273-016-0443-7 (PMC5110585; doi:10.1007/s40273-016-0443-7), 2016-09-19
Supplement: 40273_2016_443_MOESM1_ESM.pdf [file 40273_2016_443_MOESM1_ESM.pdf]

**Supplementary online resource 2 linked to:**

*Title:* Cost-utility of quadrivalent versus trivalent influenza vaccine in Germany, using an individual-based dynamic transmission model

*Authors:* Christiaan Dolk, Martin Eichner, Robert Welte, Anastassia Anastassopoulou, Laure-Anne Van Bellinghen, Barbara Poulsen Nautrup, Ilse Van Vlaenderen, Ruprecht Schmidt-Ott, Markus Schwehm, Maarten Postma.

*Journal:* Pharmacoeconomics

*Corresponding author:* Christiaan Dolk

PharmacoEpidemiology & PharmacoEconomics,  
University of Groningen,  
Antonius Deusinglaan 1,  
9713 GZ Groningen,  
The Netherlands  
Email: christiaandolk@gmail.com

## Online resource 2: Data inputs

In order to adapt a previous static model to the German context for this study, the required data were obtained from a targeted literature review and official government or statistics websites (e.g., for demographic and epidemiologic data). The search included English and German language papers and most recent and best quality studies were selected and used as a source for the model inputs shown in the tables below.

The input data used in the model were derived from published economic evaluations, national databases and government reports. Where no data for Germany were available, the published literature was used. The following sections report the probabilities, costs and outcomes used in the model. All cost data were expressed in 2014 price levels.

### 1. Probabilities

Probability of seeking medical advice (Table 1), receiving effective antiviral treatment (Table 2), having complications (Table 3, Table 4, Table 5, Table 6), being hospitalised (Table 7) and death due to influenza during hospitalisation (Table 8, Table 9) are provided below. In addition to these tables, the probability of visiting a general practitioner (GP) in case of seeking medical advice was estimated at 97%. The latter was reflected in the probabilistic sensitivity analysis (PSA) as:

- 1- Beta distribution ( $\alpha = 8.35$ ,  $\beta = 261.76$ ).

The 'At risk' population includes people at risk of complications due to influenza including people with one or more chronic conditions, people working in the health care or public order section (adults only), as well as people living in residential care (elderly only) [1].

### 2. Calculation of costs

#### 2.1. Vaccinated individuals

Vaccinated individuals from the 4Flu-model were assigned vaccination costs, which included from the healthcare payer perspective:

- TIV or QIV vaccine price: A weighted mean price of €9.24 was calculated from all TIV vaccines listed in the official price list (Lauer-Taxe, for December 2014), weighted by market share. The prices are published prices, not individually-negotiated (published or secret) prices, which can be much lower. The price for one dose QIV (calculated from a pack of 10) was set at €13.11 [2].
- Vaccine administration costs are listed in Table 10.

From the societal perspective, vaccination costs included costs in the payer perspective as well as transportation costs for vaccine administration equalling €0.07 per vaccinated person for all age-groups and both vaccines [3,4].

#### 2.2. Clinical influenza cases

Clinical symptomatic influenza cases resulting from 4Flu were assigned costs of managing influenza; based on the probability of an event (see Figure 4) multiplied by its associated cost. These costs from the payer perspective included:

- Reimbursable costs of visits for medical advice by a GP or at an accident and emergency (A/E) department (Table 11)
- Reimbursable antiviral and antibiotic costs (Table 11)
- Reimbursable inpatient (Table 12) and outpatient (Table 13) costs
- Costs borne by the child sickness benefit (Table 14), for parental absenteeism to care for a sick child ( $\leq 12$  years of age). We conservatively assumed that only mothers would stay home and considered their age- and sex-specific net earnings corrected for the age- and sex-specific labour force participation and unemployment rates.

From the societal perspective, costs of managing influenza, in addition to payer perspective costs, included:

- Non-reimbursable antiviral and antibiotic costs (Table 15)
- Over-the-counter (OTC) medication (Table 15)
- Non-reimbursable hospitalisation (Table 16) and outpatient costs (estimated at €5 from 18 years of age)
- Transportation costs related to administration of antivirals, medical advice visits and outpatient treatment visits were estimated at €9.07 for all age-groups and all risk groups. Transportation costs related to hospitalisation were estimated at €1.47 for all age-groups and all risk groups [5].
- Absenteeism costs related to uncomplicated influenza and complications (Table 17). These indirect costs were calculated on the basis of the working days lost and the average net product per day which was estimated with the labour costs corrected for the respective labour force participation and unemployment rates. For uncomplicated or outpatient influenza cases, the loss of 2.6 working days was assumed [6]. For inpatient influenza cases, a loss of 8.8 working days for sick adults (4 days hospitalization + 4.8 days at home) and of 4.8 days for sick children (no work loss of parents during hospitalization, 4.8 days at home) was applied [6].

### **2.3. Influenza deaths**

The loss of productivity due to influenza deaths was estimated using the present value of the future net product (Table 18). The future net product was estimated considering labour costs, labour force participation and unemployment rates as well as survival probabilities, by age and sex respectively. When using the human capital approach, the remaining life time was taken into account while in the friction cost method only the German friction time of 82 days was applied [7].

## **3. Calculation of health outcomes**

### **3.1. Vaccinated individuals**

No disutility due to vaccination was attributed.

### **3.2. Clinical influenza cases**

Average utility decrements during an influenza episode were multiplied by duration of influenza symptoms to obtain the disutility associated with clinical influenza cases. Utility decrements were applied to these events:

- Uncomplicated influenza (Table 19)
- Hospitalisation for complicated influenza (Table 20)
- Outpatient treatment for complicated influenza (Table 20)

### **3.3. Influenza deaths**

Finally, influenza deaths were assigned (QA)LYs lost due to premature mortality. These were calculated based on the age-specific life expectancy which in turn was calculated from the population all-cause mortality data (Table 9), assuming that all-cause mortality rates in the at-risk population were ten times the all-cause mortality rates in healthy individuals, and using the method described by the London Health Observatory[8]. These life expectancies were discounted and multiplied by age-dependent baseline utilities (Table 21) to obtain the quality-adjusted life expectancies.

## Tables for probabilities

**Table 1: Age-specific probabilities of seeking medical advice [9,10]**

| Age group (years) | 0–4    | 5–17   | 18–49  | 50–64  | 65–69  | 70–74  | 75–79  | 80–84  | 85+    |
|-------------------|--------|--------|--------|--------|--------|--------|--------|--------|--------|
| Healthy           | 20.23% | 28.58% | 28.58% | 37.48% | 16.39% | 16.39% | 16.39% | 16.39% | 16.39% |
| At risk           | 37.48% | 37.48% | 37.48% | 37.48% | 37.48% | 37.48% | 37.48% | 37.48% | 37.48% |

**Table 2: Age-specific probabilities of effective antiviral treatment in patients seeking medical advice [11,12]**

| Age group (years) | 0–4    | 5–17   | 18–49  | 50–64  | 65–69  | 70–74  | 75–79  | 80–84  | 85+    |
|-------------------|--------|--------|--------|--------|--------|--------|--------|--------|--------|
| Healthy           | 14.72% | 14.72% | 14.72% | 14.72% | 14.72% | 14.72% | 14.72% | 14.72% | 14.72% |
| At risk           | 19.63% | 19.63% | 19.63% | 19.63% | 19.63% | 19.63% | 19.63% | 19.63% | 19.63% |

**Table 3: Age-specific probability of influenza complication [13]**

| Age group (years) | 0–4    | 5–17   | 18–49  | 50–64  | 65–69  | 70–74  | 75–79  | 80–84  | 85+    |
|-------------------|--------|--------|--------|--------|--------|--------|--------|--------|--------|
| Healthy           | 14.05% | 14.05% | 7.61%  | 7.95%  | 10.34% | 10.34% | 10.34% | 10.34% | 10.34% |
| At risk           | 18.29% | 18.29% | 12.32% | 12.59% | 13.76% | 13.76% | 13.76% | 13.76% | 13.76% |

Note: The relative risk of complication with antiviral treatment was assumed to be 100% of the relative risk without antiviral treatment

**Table 4: Age-specific probability that an influenza complication is a respiratory complication [10]**

| Age group (years) | 0–4    | 5–17   | 18–49  | 50–64  | 65–69  | 70–74  | 75–79  | 80–84  | 85+    |
|-------------------|--------|--------|--------|--------|--------|--------|--------|--------|--------|
| Healthy           | 70.08% | 70.08% | 86.52% | 86.52% | 86.50% | 86.50% | 86.50% | 86.50% | 86.50% |
| At risk           | 76.51% | 76.51% | 89.41% | 89.41% | 82.60% | 82.60% | 82.60% | 82.60% | 82.60% |

Note: All other complications (i.e. 100% – probability of respiratory complication) were defined as non-respiratory complications in the model

**Table 5: Age-specific probability of a respiratory complication [10,13]**

| Age group (years)                                                     | 0–4    | 5–17   | 18–49  | 50–64  | 65–69  | 70–74  | 75–79  | 80–84  | 85+    |
|-----------------------------------------------------------------------|--------|--------|--------|--------|--------|--------|--------|--------|--------|
| <b>Probability of bronchitis complication</b>                         |        |        |        |        |        |        |        |        |        |
| Healthy                                                               | 6.65%  | 6.65%  | 18.75% | 18.75% | 33.29% | 33.29% | 33.29% | 33.29% | 33.29% |
| At risk                                                               | 4.03%  | 4.03%  | 19.05% | 19.05% | 33.91% | 33.91% | 33.91% | 33.91% | 33.91% |
| <b>Probability of pneumonia complication</b>                          |        |        |        |        |        |        |        |        |        |
| Healthy                                                               | 1.71%  | 1.71%  | 4.20%  | 4.20%  | 12.93% | 12.93% | 12.93% | 12.93% | 12.93% |
| At risk                                                               | 1.73%  | 1.73%  | 3.19%  | 3.19%  | 12.85% | 12.85% | 12.85% | 12.85% | 12.85% |
| <b>Probability of upper respiratory tract infection complication*</b> |        |        |        |        |        |        |        |        |        |
| Healthy                                                               | 91.64% | 91.64% | 77.04% | 77.04% | 53.78% | 53.78% | 53.78% | 53.78% | 53.78% |
| At risk                                                               | 94.24% | 94.24% | 77.75% | 77.75% | 53.25% | 53.25% | 53.25% | 53.25% | 53.25% |

Note: \*100% – Prob. of bronchitis complication – Prob. of pneumonia complication

**Table 6: Age-specific probability of non-respiratory complications [10,13]**

| Age group (years)                                         | 0–4    | 5–17   | 18–49  | 50–64  | 65–69  | 70–74  | 75–79  | 80–84  | 85+    |
|-----------------------------------------------------------|--------|--------|--------|--------|--------|--------|--------|--------|--------|
| <b>Probability of cardiac complication</b>                |        |        |        |        |        |        |        |        |        |
| Healthy                                                   | 0.00%  | 0.00%  | 1.48%  | 1.48%  | 7.03%  | 7.03%  | 7.03%  | 7.03%  | 7.03%  |
| At risk                                                   | 0.00%  | 0.00%  | 12.61% | 12.61% | 37.11% | 37.11% | 37.11% | 37.11% | 37.11% |
| <b>Probability of renal complication</b>                  |        |        |        |        |        |        |        |        |        |
| Healthy                                                   | 0.28%  | 0.28%  | 0.91%  | 0.91%  | 3.91%  | 3.91%  | 3.91%  | 3.91%  | 3.91%  |
| At risk                                                   | 0.00%  | 0.00%  | 2.17%  | 2.17%  | 7.55%  | 7.55%  | 7.55%  | 7.55%  | 7.55%  |
| <b>Probability of central nervous system complication</b> |        |        |        |        |        |        |        |        |        |
| Healthy                                                   | 2.34%  | 2.34%  | 10.82% | 10.82% | 16.41% | 16.41% | 16.41% | 16.41% | 16.41% |
| At risk                                                   | 0.00%  | 0.00%  | 6.52%  | 6.52%  | 14.47% | 14.47% | 14.47% | 14.47% | 14.47% |
| <b>Probability of otitis media</b>                        |        |        |        |        |        |        |        |        |        |
| Healthy                                                   | 94.34% | 94.34% | 62.41% | 62.41% | 16.41% | 16.41% | 16.41% | 16.41% | 16.41% |
| At risk                                                   | 95.63% | 95.63% | 47.83% | 47.83% | 6.92%  | 6.92%  | 6.92%  | 6.92%  | 6.92%  |
| <b>Probability of gastrointestinal bleeding*</b>          |        |        |        |        |        |        |        |        |        |
| Healthy                                                   | 3.03%  | 3.03%  | 24.37% | 24.37% | 56.25% | 56.25% | 56.25% | 56.25% | 56.25% |
| At risk                                                   | 4.38%  | 4.38%  | 30.87% | 30.87% | 33.96% | 33.96% | 33.96% | 33.96% | 33.96% |

Note: \*100% – Prob. of cardiac complication – Prob. of renal complication – Prob. of central nervous system complication – Prob. of otitis media

**Table 7: Age-specific probability of hospitalisation for influenza complications [14–16]**

| Age group (years) | 0–4    | 5–17  | 18–49 | 50–64 | 65–69  | 70–74  | 75–79  | 80–84  | 85+    |
|-------------------|--------|-------|-------|-------|--------|--------|--------|--------|--------|
| Healthy           | 12.10% | 5.69% | 5.26% | 5.03% | 42.55% | 42.55% | 42.55% | 42.55% | 42.55% |
| At risk           | 9.29%  | 4.37% | 3.25% | 3.18% | 71.22% | 71.22% | 71.22% | 71.22% | 71.22% |

Note: All non-hospitalised influenza complications (i.e. 100% – probability to be hospitalised for influenza complication) were defined as influenza complications treated in outpatient setting

**Table 8: Age-specific probability of influenza death after hospitalisation for influenza [13–16]**

| Age group (years) | 0–4   | 5–17  | 18–49 | 50–64 | 65–69  | 70–74  | 75–79  | 80–84  | 85+    |
|-------------------|-------|-------|-------|-------|--------|--------|--------|--------|--------|
| Healthy           | 0.26% | 0.26% | 0.45% | 0.45% | 10.00% | 10.00% | 10.00% | 10.00% | 10.00% |
| At risk           | 0.26% | 0.26% | 0.45% | 0.45% | 10.00% | 10.00% | 10.00% | 10.00% | 10.00% |

**Table 9: All-cause mortality rates for the entire population [17]**

| Age       | Rate        | Age       | Rate        | Age       | Rate        | Age       | Rate        | Age        | Rate        |
|-----------|-------------|-----------|-------------|-----------|-------------|-----------|-------------|------------|-------------|
| <b>0</b>  | 0.003296370 |           |             |           |             |           |             |            |             |
| <b>1</b>  | 0.000284966 | <b>21</b> | 0.000316722 | <b>41</b> | 0.001080550 | <b>61</b> | 0.008341450 | <b>81</b>  | 0.058237607 |
| <b>2</b>  | 0.000142112 | <b>22</b> | 0.000308864 | <b>42</b> | 0.001184856 | <b>62</b> | 0.009043873 | <b>82</b>  | 0.068709668 |
| <b>3</b>  | 0.000123367 | <b>23</b> | 0.000346517 | <b>43</b> | 0.001358565 | <b>63</b> | 0.009830805 | <b>83</b>  | 0.074899099 |
| <b>4</b>  | 0.000089397 | <b>24</b> | 0.000343137 | <b>44</b> | 0.001477879 | <b>64</b> | 0.010535550 | <b>84</b>  | 0.085724070 |
| <b>5</b>  | 0.000107144 | <b>25</b> | 0.000370003 | <b>45</b> | 0.001657630 | <b>65</b> | 0.011212327 | <b>85</b>  | 0.154872608 |
| <b>6</b>  | 0.000081217 | <b>26</b> | 0.000384326 | <b>46</b> | 0.001902491 | <b>66</b> | 0.012524456 | <b>86</b>  | 0.154872608 |
| <b>7</b>  | 0.000082736 | <b>27</b> | 0.000346048 | <b>47</b> | 0.002049634 | <b>67</b> | 0.012233383 | <b>87</b>  | 0.154872608 |
| <b>8</b>  | 0.000081080 | <b>28</b> | 0.000406893 | <b>48</b> | 0.002309535 | <b>68</b> | 0.017936268 | <b>88</b>  | 0.154872608 |
| <b>9</b>  | 0.000090836 | <b>29</b> | 0.000427836 | <b>49</b> | 0.002582015 | <b>69</b> | 0.016285869 | <b>89</b>  | 0.154872608 |
| <b>10</b> | 0.000061419 | <b>30</b> | 0.000477093 | <b>50</b> | 0.002777541 | <b>70</b> | 0.016857255 | <b>90</b>  | 0.154872608 |
| <b>11</b> | 0.000058931 | <b>31</b> | 0.000465166 | <b>51</b> | 0.003326866 | <b>71</b> | 0.020983410 | <b>91</b>  | 0.154872608 |
| <b>12</b> | 0.000084326 | <b>32</b> | 0.000506520 | <b>52</b> | 0.003616012 | <b>72</b> | 0.020297756 | <b>92</b>  | 0.154872608 |
| <b>13</b> | 0.000087114 | <b>33</b> | 0.000531660 | <b>53</b> | 0.004108419 | <b>73</b> | 0.022415784 | <b>93</b>  | 0.154872608 |
| <b>14</b> | 0.000107360 | <b>34</b> | 0.000592365 | <b>54</b> | 0.004441420 | <b>74</b> | 0.023526565 | <b>94</b>  | 0.154872608 |
| <b>15</b> | 0.000150049 | <b>35</b> | 0.000648692 | <b>55</b> | 0.004993454 | <b>75</b> | 0.026083813 | <b>95</b>  | 0.154872608 |
| <b>16</b> | 0.000198558 | <b>36</b> | 0.000637252 | <b>56</b> | 0.005374986 | <b>76</b> | 0.030365074 | <b>96</b>  | 0.154872608 |
| <b>17</b> | 0.000220727 | <b>37</b> | 0.000692573 | <b>57</b> | 0.005869635 | <b>77</b> | 0.033897024 | <b>97</b>  | 0.154872608 |
| <b>18</b> | 0.000316466 | <b>38</b> | 0.000806242 | <b>58</b> | 0.006590000 | <b>78</b> | 0.038962730 | <b>98</b>  | 0.154872608 |
| <b>19</b> | 0.000338737 | <b>39</b> | 0.000927081 | <b>59</b> | 0.007032840 | <b>79</b> | 0.039942431 | <b>99</b>  | 0.154872608 |
| <b>20</b> | 0.000330642 | <b>40</b> | 0.001009784 | <b>60</b> | 0.007763990 | <b>80</b> | 0.050489664 | <b>100</b> | 0.154872608 |

## Tables for costs

**Table 10: Vaccine administration costs [18]**

| Age group (years)                     | 0–4    | 5–17   | 18–49  | 50–64  | 65–69 | 70–74 | 75–79 | 80–84 | 85+   |
|---------------------------------------|--------|--------|--------|--------|-------|-------|-------|-------|-------|
| Vaccine administration cost           | €7.41  | €7.41  | €7.41  | €7.41  | €7.41 | €7.41 | €7.41 | €7.41 | €7.41 |
| GP visit                              | €22.48 | €14.08 | €10.66 | €11.37 | €0.00 | €0.00 | €0.00 | €0.00 | €0.00 |
| Total cost for vaccine administration | €29.89 | €21.49 | €18.08 | €18.79 | €7.41 | €7.41 | €7.41 | €7.41 | €7.41 |

GP: general practitioner

**Table 11: Costs of GP, A/E visits, antivirals and antibiotics [11,18–20]**

| Age group (years) | 0–4    | 5–17   | 18–49  | 50–64  | 65–69  | 70–74  | 75–79  | 80–84  | 85+    |
|-------------------|--------|--------|--------|--------|--------|--------|--------|--------|--------|
| GP visits         | €36.41 | €27.69 | €25.81 | €27.82 | €28.75 | €28.75 | €32.87 | €34.12 | €34.12 |
| A&E visits        | €39.81 | €31.10 | €28.33 | €30.44 | €31.80 | €31.80 | €35.92 | €37.17 | €37.17 |
| Antivirals        | €25.59 | €35.44 | €27.72 | €27.72 | €27.72 | €27.72 | €27.72 | €27.72 | €27.72 |
| Antibiotics       | €5.36  | €5.36  | €4.49  | €4.49  | €4.49  | €4.49  | €4.49  | €4.49  | €4.49  |

A&E: accident and emergency; GP: general practitioner

Note: antibiotics cost is average cost of antibiotics and proportion of influenza patients receiving antibiotics

**Table 12: Mean hospitalisation cost, calculated from German DRGs for different types of complications [21–23]**

| Age group (years) | 0–4       | 5–17      | 18–49     | 50–64     | 65–69     | 70–74     | 75–79     | 80–84     | 85+       |
|-------------------|-----------|-----------|-----------|-----------|-----------|-----------|-----------|-----------|-----------|
| Bronchitis        | €2,770.75 | €2,770.75 | €2,770.75 | €2,770.75 | €2,770.75 | €2,770.75 | €2,770.75 | €2,770.75 | €2,770.75 |
| Pneumonia         | €3,918.05 | €3,918.05 | €3,918.05 | €3,918.05 | €3,918.05 | €3,918.05 | €3,918.05 | €3,918.05 | €3,918.05 |
| URTI              | €2,101.56 | €2,101.56 | €2,101.56 | €2,101.56 | €2,101.56 | €2,101.56 | €2,101.56 | €2,101.56 | €2,101.56 |
| Cardiac           | €3,130.84 | €3,130.84 | €3,130.84 | €3,130.84 | €3,130.84 | €3,130.84 | €3,130.84 | €3,130.84 | €3,130.84 |
| Renal             | €4,258.17 | €4,258.17 | €4,258.17 | €4,258.17 | €4,258.17 | €4,258.17 | €4,258.17 | €4,258.17 | €4,258.17 |
| CNS               | €2,678.94 | €2,678.94 | €2,678.94 | €2,678.94 | €2,678.94 | €2,678.94 | €2,678.94 | €2,678.94 | €2,678.94 |
| OM                | €1,344.74 | €1,344.74 | €1,344.74 | €1,344.74 | €1,344.74 | €1,344.74 | €1,344.74 | €1,344.74 | €1,344.74 |
| GI bleeding       | €1,689.91 | €1,689.91 | €1,689.91 | €1,689.91 | €1,689.91 | €1,689.91 | €1,689.91 | €1,689.91 | €1,689.91 |

CNS: central nervous system; DRG: diagnosis-related group; GI: gastrointestinal; OM: otitis media; URTI, upper respiratory tract infection



**Table 13: Outpatient treatment cost for complications [5,24,25]**

| Age group (years)                    | 0–4     | 5–17    | 18–49   | 50–64   | 65–69   | 70–74   | 75–79   | 80–84   | 85+     |
|--------------------------------------|---------|---------|---------|---------|---------|---------|---------|---------|---------|
| Bronchitis                           | €60.42  | €60.42  | €55.42  | €55.42  | €55.42  | €55.42  | €55.42  | €55.42  | €55.42  |
| Pneumonia                            | €107.00 | €107.00 | €102.00 | €102.00 | €102.00 | €102.00 | €102.00 | €102.00 | €102.00 |
| URTI                                 | €67.97  | €67.97  | €62.97  | €62.97  | €62.97  | €62.97  | €62.97  | €62.97  | €62.97  |
| Cardiac, renal, CNS<br>& GI bleeding | €72.58  | €72.58  | €67.58  | €67.58  | €67.58  | €67.58  | €67.58  | €67.58  | €67.58  |
| Otitis media                         | €62.24  | €62.24  | €59.20  | €59.20  | €59.20  | €59.20  | €59.20  | €59.20  | €59.20  |

CNS: central nervous system; GI: gastrointestinal; URTI, upper respiratory tract infection

Note: Duration of outpatient complication treatment assumed to be same as LOS in hospital (Table 12)

**Table 14: Child sickness benefit [26–28]**

| Age group (years) | 0–4   | 5–17  | 18–49 | 50–64 | 65–69 | 70–74 | 75–79 | 80–84 | 85+   |
|-------------------|-------|-------|-------|-------|-------|-------|-------|-------|-------|
| Cost              | €2.75 | €4.91 | €0.00 | €0.00 | €0.00 | €0.00 | €0.00 | €0.00 | €0.00 |

**Table 15: Non-reimbursable antiviral and antibiotic costs, OTC medication [20,29]**

| Age group (years) | 0–4   | 5–17  | 18–49 | 50–64 | 65–69 | 70–74 | 75–79 | 80–84 | 85+   |
|-------------------|-------|-------|-------|-------|-------|-------|-------|-------|-------|
| Antivirals        | €0.0  | €0.0  | €5.00 | €5.00 | €5.00 | €5.00 | €5.00 | €5.00 | €5.00 |
| Antibiotics       | €0.0  | €0.0  | €0.88 | €0.88 | €0.88 | €0.88 | €0.88 | €0.88 | €0.88 |
| OTC medication    | €5.74 | €5.74 | €5.74 | €5.74 | €5.74 | €5.74 | €5.74 | €5.74 | €5.74 |

OTC: Over-the-counter

**Table 16: Non-reimbursable hospitalisation costs [21,22,30]**

| Age group (years)     | 0–4 | 5–17 | 18–49   | 50–64   | 65–69   | 70–74   | 75–79   | 80–84   | 85+     |
|-----------------------|-----|------|---------|---------|---------|---------|---------|---------|---------|
| Bronchitis            | €0  | €0   | €67.05  | €67.05  | €67.05  | €67.05  | €67.05  | €67.05  | €67.05  |
| Pneumonia             | €0  | €0   | €91.56  | €91.56  | €91.56  | €91.56  | €91.56  | €91.56  | €91.56  |
| URTI                  | €0  | €0   | €60.11  | €60.11  | €60.11  | €60.11  | €60.11  | €60.11  | €60.11  |
| Cardiac complications | €0  | €0   | €71.03  | €71.03  | €71.03  | €71.03  | €71.03  | €71.03  | €71.03  |
| Renal complications   | €0  | €0   | €101.43 | €101.43 | €101.43 | €101.43 | €101.43 | €101.43 | €101.43 |
| CNS                   | €0  | €0   | €64.39  | €64.39  | €64.39  | €64.39  | €64.39  | €64.39  | €64.39  |
| Otitis media          | €0  | €0   | €33.29  | €33.29  | €33.29  | €33.29  | €33.29  | €33.29  | €33.29  |
| GI bleeding           | €0  | €0   | €42.37  | €42.37  | €42.37  | €42.37  | €42.37  | €42.37  | €42.37  |

CNS: central nervous system; GI: gastrointestinal; URTI, upper respiratory tract infection

**Table 17: Absenteeism costs [31,32]**

| Age group (years)                              | 0–4    | 5–17   | 18–64     | 65+   |
|------------------------------------------------|--------|--------|-----------|-------|
| Uncomplicated influenza / Outpatient treatment | €24.69 | €42.53 | €87.44    | €0.00 |
| Hospitalisation                                | €24.69 | €42.53 | €1,655.52 | €0.00 |

**Table 18: Age-specific productivity loss costs due to premature mortality (Human Capital Approach, 3% discount rate) [17,32,33]**

| Age group (years) | Value (€) |
|-------------------|-----------|-------------------|-----------|-------------------|-----------|-------------------|-----------|
| 0-4               | €35,147   | 20-24             | €07,466   | 40-44             | €96,860   | 60-61             | €102,705  |
| 5-9               | €20,742   | 25-29             | €28,037   | 45-49             | €57,925   | 65-69             | €24,812   |
| 10-14             | €19,951   | 30-34             | €89,482   | 50-54             | €400,730  | 70+               | €0        |
| 15-19             | €26,833   | 35-39             | €09,018   | 55-59             | €37,494   |                   |           |

## Tables for outcomes

**Table 19: Influenza disutility and duration of influenza in case of uncomplicated influenza [14–16,34–36]**

| Age group (years)                                  | 0–4      | 5–17     | 18–49    | 50–64    | 65–69     | 70–74 | 75–79 | 80–84 | 85+ |
|----------------------------------------------------|----------|----------|----------|----------|-----------|-------|-------|-------|-----|
| <b>Disutility influenza</b>                        | -0.32    | -0.32    | -0.32    | -0.32    | -0.32     |       |       |       |     |
| <b>Influenza duration (no antiviral treatment)</b> | 6.6 days | 6.6 days | 7.7 days | 7.7 days | 10.0 days |       |       |       |     |
| <b>Influenza duration (antiviral treatment)</b>    | 5.6 days | 5.6 days | 6.7 days | 6.7 days | 9.0 days  |       |       |       |     |

**Table 20: Influenza disutility and duration of influenza in case of complicated influenza [14–16,22,36,37]**

| Complication name                                 | Bronchitis | Pneumonia | URTI   | Cardiac | Renal  | CNS    | OM     | GI bleeding |
|---------------------------------------------------|------------|-----------|--------|---------|--------|--------|--------|-------------|
| <b>Disutility influenza hospitalisation</b>       | -0.38      |           |        |         |        |        |        |             |
| <b>Disutility influenza outpatient treatment*</b> | -0.251     | -0.251    | -0.127 | -0.13   | -0.176 | -0.262 | -0.015 | -0.118      |
| <b>Influenza duration (days)*</b>                 | 6.7        | 9.2       | 6.0    | 7.1     | 10.1   | 6.4    | 3.3    | 4.2         |

\* No difference in values is observed between age-groups.

CNS: central nervous system; GI: gastrointestinal; OM: otitis media; URTI, upper respiratory tract infection

**Table 21: Baseline utilities [37]**

| Age group (years) | 0–4  | 5–17 | 18–49 | 50–64 | 65–69 | 70–74 | 75–79 | 80–84 | 85+  |
|-------------------|------|------|-------|-------|-------|-------|-------|-------|------|
| <b>Healthy</b>    | 0.96 | 0.96 | 0.95  | 0.93  | 0.93  | 0.92  | 0.90  | 0.88  | 0.82 |
| <b>At risk</b>    | 0.94 | 0.94 | 0.91  | 0.82  | 0.80  | 0.78  | 0.75  | 0.70  | 0.65 |

**Table 22: PSA distributions and type of input parameters**

| Parameter                                                                      | PSA distribution | PSA type of input parameters |
|--------------------------------------------------------------------------------|------------------|------------------------------|
| <b>Probabilities</b>                                                           |                  |                              |
| Probability to seek for medical advice                                         | Beta             | Uninf SE                     |
| Probability of GP visit                                                        | Beta             | Alpha, Beta                  |
| Probability to receive effective NI in patients seeking MA                     | Beta             | Uninf SE                     |
| Probability of influenza complication                                          | Beta             | Alpha, Beta                  |
| Probability of a respiratory-related complication                              | Beta             | Alpha, Beta                  |
| Probability that a respiratory complication is bronchitis, pneumonia or URTI   | Beta             | Alpha, Beta                  |
| Probability that a non-respiratory complication is cardiac, renal, CNS, OM, GI | Beta             | Alpha, Beta                  |
| Probability of hospitalisation for influenza complications                     | Beta             | Uninf SE                     |
| Probability of influenza death after hospitalisation for influenza             | Beta             | Uninf SE                     |

|                                                           |                    |                                        |
|-----------------------------------------------------------|--------------------|----------------------------------------|
| <b>Reimbursable medical costs</b>                         |                    |                                        |
| Cost of antibiotics                                       | Gamma              | Uninf SE                               |
| Cost of hospitalisation with complication                 | Gamma              | SE                                     |
| Cost of outpatient treatment for complication             | Gamma              | SE or uninf SE                         |
| <b>Reimbursable non-medical costs</b>                     |                    |                                        |
| Child sickness benefit (“Kinderkrankengeld”)              | Normal (0-17y)     | Lower and upper limit CI = -/+ 5% mean |
| <b>Non-reimbursable costs (for societal perspective)</b>  |                    |                                        |
| Non-reimbursed OTC medication                             | Gamma              | Uninf SE                               |
| Non-reimbursed costs related to hospitalisation           | Gamma (>17y)       | SE                                     |
| Transportation costs                                      | Gamma              | Uninf SE                               |
| <b>Indirect costs (for societal perspective)</b>          |                    |                                        |
| Absenteeism with uncomplicated influenza                  | Normal (0-64y)     | Lower and upper limit CI = -/+ 5% mean |
| Absenteeism because of hospitalisation                    | Normal (0-64y)     | Lower and upper limit CI = -/+ 5% mean |
| Absenteeism because of outpatient treatment               | Normal (0-64y)     | Lower and upper limit CI = -/+ 5% mean |
| <b>Outcomes</b>                                           |                    |                                        |
| Baseline utilities                                        | Beta               | SE                                     |
| Disutility with influenza                                 | Beta               | Estimated SE                           |
| Influenza duration (with and without antiviral treatment) | Lognormal          | Ln(mean) and SE(ln mean)               |
| Disutility influenza in case of hospitalisation           | Beta               | Estimated SE                           |
| Influenza duration of hospitalisation                     | Gamma              | SE                                     |
| Disutility influenza in case of outpatient treatment      | Gamma<br>Lognormal | Uninf SE                               |
| Influenza duration of outpatient treatment                | Gamma              | SE                                     |

CI: confidence interval; CNS: central nervous system; GI: gastrointestinal; GP: general practitioner; MA: medical advice; NI: neuraminidase inhibitors; OM: otitis media; OTC: over-the-counter; PSA: probabilistic sensitivity analysis; SE: standard error; Unif: uniformed; URTI: upper respiratory tract infection; y: years

## References supplementary material

1. Koch Institut R. Anhang zum Nationalen Pandemieplan (Stand: Mai 2007) [Internet]. 2007 [cited 2016 Jul 29]. Available from: [http://www.rki.de/DE/Content/InfAZ/I/Influenza/Pandemieplanung/Downloads/Influenzapandemieplan\\_Anhang.pdf;jsessionid=ADDF21773449665793E01F883C8FE147.2\\_cid298?\\_\\_blob=publicationFile](http://www.rki.de/DE/Content/InfAZ/I/Influenza/Pandemieplanung/Downloads/Influenzapandemieplan_Anhang.pdf;jsessionid=ADDF21773449665793E01F883C8FE147.2_cid298?__blob=publicationFile)
2. Lauer-Fischer - Apothekensoftware und Arzneimitteldaten. [Internet]. [cited 2015 Dec 1]. Available from: <http://www2.lauer-fischer.de/home/>
3. Kassenärztliche Bundesvereinigung [Internet]. Kassenärztliche Bundesvereinigung (KBV); [cited 2016 Apr 29]. Available from: <http://www.kbv.de/html/>
4. AOK [Internet]. Available from: <http://www.aok-gesundheitspartner.de/>
5. Ehlken B, Ihorst G, Lippert B, Rohwedder A, Petersen G, Schumacher M, et al. Economic impact of community-acquired and nosocomial lower respiratory tract infections in young children in Germany. *Eur. J. Pediatr.* 2005;164:607–15.
6. Keech M, Beardsworth P. The impact of influenza on working days lost: a review of the literature. *Pharmacoeconomics.* 2008;26:911–24.
7. Brenzel H, Kettner A, Kubis A, Moczall A, Müller A, Rebien M, et al. Neueinstellungen im Jahr 2012: Strukturwandel und Demografie prägten die Personalsuche. *IAB-Kurzbericht.* 2013;17:1–6.
8. Fitzpatrick J. Calculating life expectancy and infant mortality rates Mapping health inequalities across London: technical supplement [Internet]. 2001. Available from: [http://www.lho.org.uk/Download/Public/7656/1/tech\\_supp\\_3.pdf](http://www.lho.org.uk/Download/Public/7656/1/tech_supp_3.pdf)
9. Ryan J, Zoellner Y, Gradl B, Palache B, Medema J. Establishing the health and economic impact of influenza vaccination within the European Union 25 countries. *Vaccine.* 2006;24:6812–22.
10. Tappenden P, Jackson R, Cooper K, Rees A, Simpson E, Read R, et al. Amantadine, oseltamivir and zanamivir for the prophylaxis of influenza (including a review of existing guidance no. 67): a systematic review and economic evaluation. *Health Technol. Assess.* 2009;13:iii, ix – xii, 1–246.
11. Aballéa S, Chancellor J, Martin M, Wutzler P, Carrat F, Gasparini R, et al. The cost-effectiveness of influenza vaccination for people aged 50 to 64 years: an international model. *Value Health.* 10:98–116.
12. Thorlund K, Awad T, Boivin G, Thabane L, Hurt A, HO H, et al. Systematic review of influenza resistance to the neuraminidase inhibitors. *BMC Infect. Dis. BioMed Central;* 2011;11:134.
13. Meier CR, Napalkov PN, Wegmüller Y, Jefferson T, Jick H. Population-based study on incidence, risk factors, clinical complications and drug utilisation associated with influenza in the United Kingdom. *Eur. J. Clin. Microbiol. Infect. Dis.* 2000;19:834–42.
14. Rothberg MB, Bellantonio S, Rose DN. Management of influenza in adults older than 65 years of age: cost-effectiveness of rapid testing and antiviral therapy. *Ann. Intern. Med.* 2003;139:321–9.
15. Rothberg MB, He S, Rose DN. Management of influenza symptoms in healthy adults. *J. Gen. Intern. Med.* 2003;18:808–15.
16. Rothberg MB, Fisher D, Kelly B, Rose DN. Management of influenza symptoms in healthy children: cost-effectiveness of rapid testing and antiviral therapy. *Arch. Pediatr. Adolesc. Med.*

2005;159:1055–62.

17. Federal Statistical Bureau [Internet]. [cited 2016 Feb 2]. Available from: <https://www.destatis.de/DE/Startseite.html>

18. Einheitlicher Bewertungsmaßstab (EBM) [Internet]. [cited 2016 Feb 2]. Available from: [http://www.kbv.de/media/sp/EBM\\_Gesamt\\_\\_\\_Stand\\_2.\\_Quartal\\_2014.pdf](http://www.kbv.de/media/sp/EBM_Gesamt___Stand_2._Quartal_2014.pdf)

19. Rote Liste. Frankfurt/Main, Germany: Rote Liste Service GmbH; 2014.

20. Lugnér AK, van Boven M, de Vries R, Postma MJ, Wallinga J. Cost effectiveness of vaccination against pandemic influenza in European countries: mathematical modelling analysis. *BMJ*. 2012;345:e4445.

21. G-DRG-Browser 2013\_2014 [Internet]. [cited 2016 Feb 2]. Available from: <http://www.g-drg.de>

22. InEK Fallpauschalenkatalog 2014 [Internet]. [cited 2016 Feb 2]. Available from: [http://www.g-drg.de/cms/G-DRG-System\\_2014/Fallpauschalen-Katalog/Fallpauschalen-Katalog\\_2014](http://www.g-drg.de/cms/G-DRG-System_2014/Fallpauschalen-Katalog/Fallpauschalen-Katalog_2014)

23. GKV-Spitzenverband [Internet]. [cited 2016 Feb 2]. Available from: [http://www.gkv-spitzenverband.de/media/dokumente/krankenversicherung\\_1/krankenhaeuser/budgetverhandlungen/bundesbasisfallwert/KH\\_BBFW\\_2014.pdf](http://www.gkv-spitzenverband.de/media/dokumente/krankenversicherung_1/krankenhaeuser/budgetverhandlungen/bundesbasisfallwert/KH_BBFW_2014.pdf)

24. Chevat C, Peña BM, Al MJ, Rutten FF. Healthcare resource utilisation and costs of treating NSAID-associated gastrointestinal toxicity. A multinational perspective. *Pharmacoeconomics*. 2001;19 Suppl 1:17–32.

25. Wolleswinkel-van den Bosch JH, Stolk EA, Francois M, Gasparini R, Brosa M. The health care burden and societal impact of acute otitis media in seven European countries: results of an Internet survey. *Vaccine*. 2010;28 Suppl 6:G39–52.

26. Gesundheitsbericht-erstat-tung des Bundes; Arbeitsunfähigkeit [Internet]. [cited 2016 May 3]. Available from: <http://www.gbe-bund.de/stichworte/Arbeitsunfaehigkeit.html>

27. Stand und Entwicklung der Erwerbstätigkeit in Deutschland [Internet]. [cited 2016 May 3]. Available from: <https://www.destatis.de/DE/Publikationen/Thematisch/Arbeitsmarkt/Erwerbstaetige/StandEntwicklungErwerbstaetigkeit.html>

28. Schäfer D. Unbezahlte Arbeit und Bruttoinlandsprodukt 1992 und 2001. Neuberechnung des Haushalts-Satellitensystems. *Wirtsch. Stat*. 2004;9:960–78.

29. Arzneimittel: Die wichtigsten Regelungen für Zuzahlung und Erstattung im Überblick [Internet]. [cited 2016 Feb 2]. Available from: <http://www.bmg.bund.de/themen/krankenversicherung/arzneimittelversorgung/zuzahlung.html>

30. Krankenhausaufnahme [Internet]. Available from: <http://www.krankenhausaufnahme.de/stationaer/zuzahlung.php>

31. Statistical Yearbook 2014 [Internet]. Available from: <https://www.destatis.de/jahrbuch>

32. Grundlagen der Lohn- und Gehaltsabrechnung - Zeitberechnungen [Internet]. [cited 2016 May 3]. Available from: <http://www.lohn-info.de/zeitberechnungen.html>

33. Lohnnebenkosten [Internet]. [cited 2016 May 3]. Available from: <http://lohnrechner.com.de/Lohnnebenkosten.php>

34. Turner D, Wailoo A, Nicholson K, Cooper N, Sutton A, Abrams K. Systematic review and economic decision modelling for the prevention and treatment of influenza A and B. *Health Technol. Assess.* 2003;7:iii – iv, xi – xiii, 1–170.
35. Braun S, Behrens T, Kulp W, Eberle A, Greiner W, Ahrens W, et al. Neuraminidasehemmer in der Therapie und Postexpositionsprophylaxe der Influenza [Internet]. 2005 [cited 2016 Feb 2]. Available from: [http://portal.dimdi.de/de/hta/hta\\_berichte/hta116\\_bericht\\_de.pdf](http://portal.dimdi.de/de/hta/hta_berichte/hta116_bericht_de.pdf)
36. Bilcke J, Coenen S, Beutels P. Influenza-like-illness and clinically diagnosed flu: disease burden, costs and quality of life for patients seeking ambulatory care or no professional care at all. *PLoS One.* 2014;9:e102634.
37. Ara R, Brazier JE. Using health state utility values from the general population to approximate baselines in decision analytic models when condition-specific data are not available. *Value Health.* 2011;14:539–45.
