# Supplementary material for: Cost-Utility of Quadrivalent Versus Trivalent Influenza Vaccine in Germany, Using an Individual-Based Dynamic Transmission Model
Source: PubMed Central journal article supplement — Pharmacoeconomics. 2016 Sep 19;34(12):1299–308. doi: 10.1007/s40273-016-0443-7 (PMC5110585; doi:10.1007/s40273-016-0443-7), 2016-09-19

**Supplementary online resource 1 linked to:**

*Title:* Cost-utility of quadrivalent versus trivalent influenza vaccine in Germany, using an individual-based dynamic transmission model

*Authors:* Christiaan Dolk, Martin Eichner, Robert Welte, Anastassia Anastassopoulou, Laure-Anne Van Bellinghen, Barbara Poulsen Nautrup, Ilse Van Vlaenderen, Ruprecht Schmidt-Ott, Markus Schwehm, Maarten Postma.

*Journal:* Pharmacoeconomics

*Corresponding author:* Christiaan Dolk

PharmacoEpidemiology & PharmacoEconomics,  
University of Groningen,  
Antonius Deusinglaan 1,  
9713 GZ Groningen,  
The Netherlands  
Email: [christiaandolk@gmail.com](mailto:christiaandolk@gmail.com)

Online resource 1: Conceptual model showing event pathways of symptomatic influenza

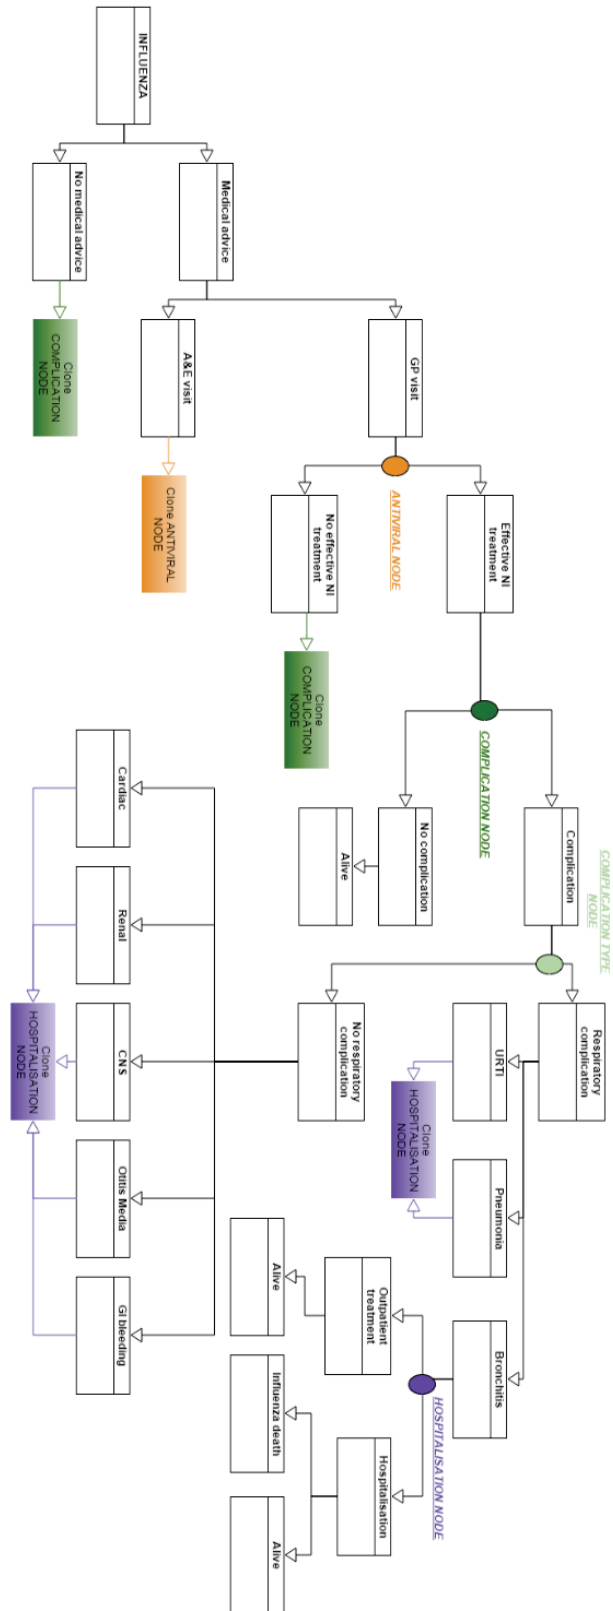

Supplement: 40273_2016_443_MOESM2_ESM.pdf [file 40273_2016_443_MOESM2_ESM.pdf]
